# Supplementary material for: TRPV2: A Key Player in Myelination Disorders of the Central Nervous System
Source: MDPI journal article supplement (doi:10.3390/ijms23073617), 2022-03-25
Supplement: s1 [file s1]

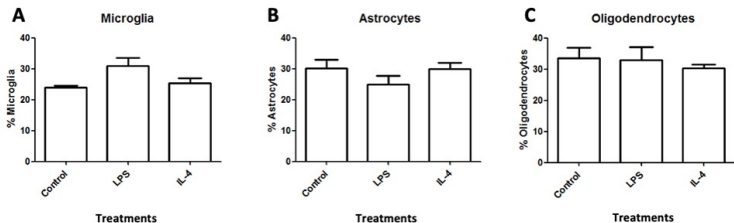

**Supplementary Figure S1.** Determination of glial populations in mixed glial secondary cell cultures in basal conditions and after pro-inflammatory LPS and anti-inflammatory IL-4 treatments.

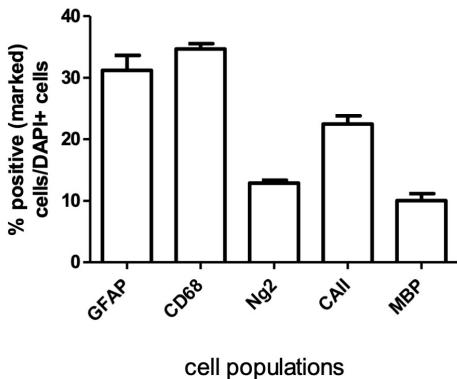

**Supplementary Figure S2.** . Characterization of mixed glial cultures under basal conditions.

| Western Blot<br>Quantification      | Healthy (H) |       |       |                   | Multiple Sclerosis (MS) |       |       |       |                   | Unpaired t test<br>(H vs MS) |
|-------------------------------------|-------------|-------|-------|-------------------|-------------------------|-------|-------|-------|-------------------|------------------------------|
|                                     | H1          | H2    | H3    | MEAN              | MS1                     | MS2   | MS3   | MS4   | MEAN              |                              |
| MSRA                                | 0,878       | 0,873 | 1,016 |                   | 1,277                   | 1,344 | 1,246 | 1,290 |                   |                              |
| TRPV2                               | 0,280       | 0,263 | 0,227 |                   | 0,238                   | 0,221 | 0,176 | 0,152 |                   |                              |
| Correction Factor ( $\beta$ -Actin) | 1,027       | 1,063 | 0,946 |                   | 1,067                   | 1,026 | 1,008 | 0,863 |                   |                              |
| MSRA $\beta$ -Actin-Normalized      | 0,856       | 0,821 | 1,074 | 0,917 $\pm$ 0,137 | 1,196                   | 1,309 | 1,236 | 1,495 | 1,309 $\pm$ 0,133 | *, p = 0,0124                |
| TRPV2 $\beta$ -Actin-Normalized     | 0,273       | 0,248 | 0,240 | 0,253 $\pm$ 0,017 | 0,223                   | 0,216 | 0,175 | 0,176 | 0,197 $\pm$ 0,026 | *, p = 0,0232                |

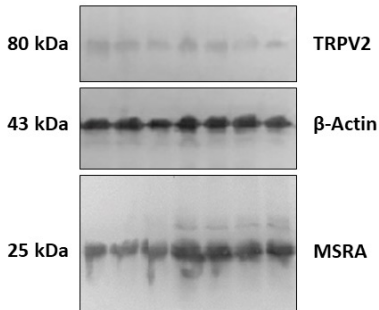

**Supplementary Figure S3.** Protein determination and data analysis of immunoblot in Figure 6C.

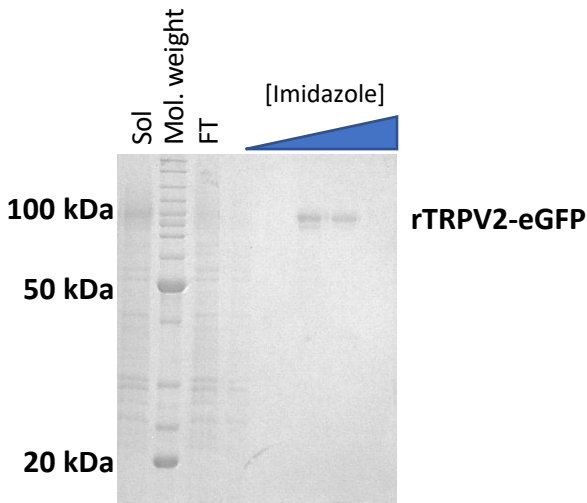

**Supplementary Figure S4.** Coomassie blue staining of Ni-NTA FL-TRPV2 enrichment and imidazole elution resolved in a 12% SDS-PAGE electrophoresis. Sol; detergent solubilized fraction loaded in the chromatography column. FT; Flow through fraction.
